# Supplementary material for: A Case-Control Study on Factors of HPV Vaccination for Mother and Daughter in China
Source: MDPI journal article supplement (doi:10.3390/vaccines11050976), 2023-05-12
Supplement: s1 [file s1]

## Supplementary Materials:

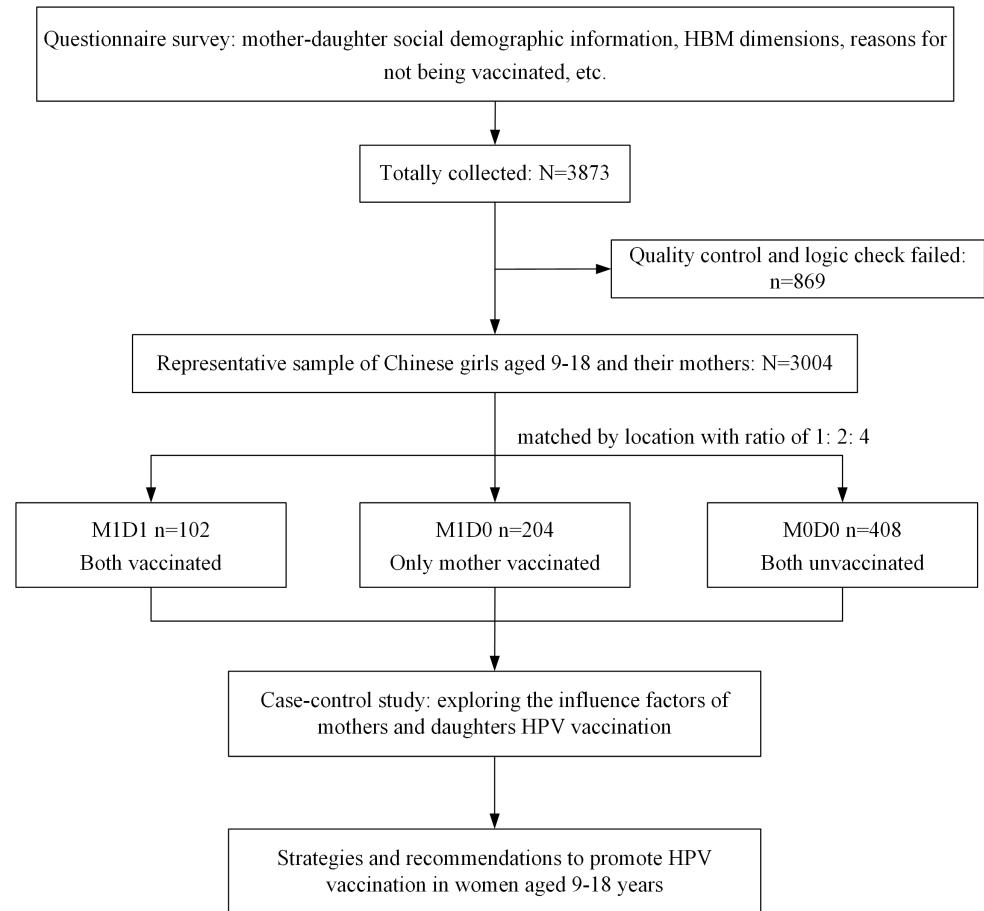

**Figure S1.** Research path map and sample collection status.

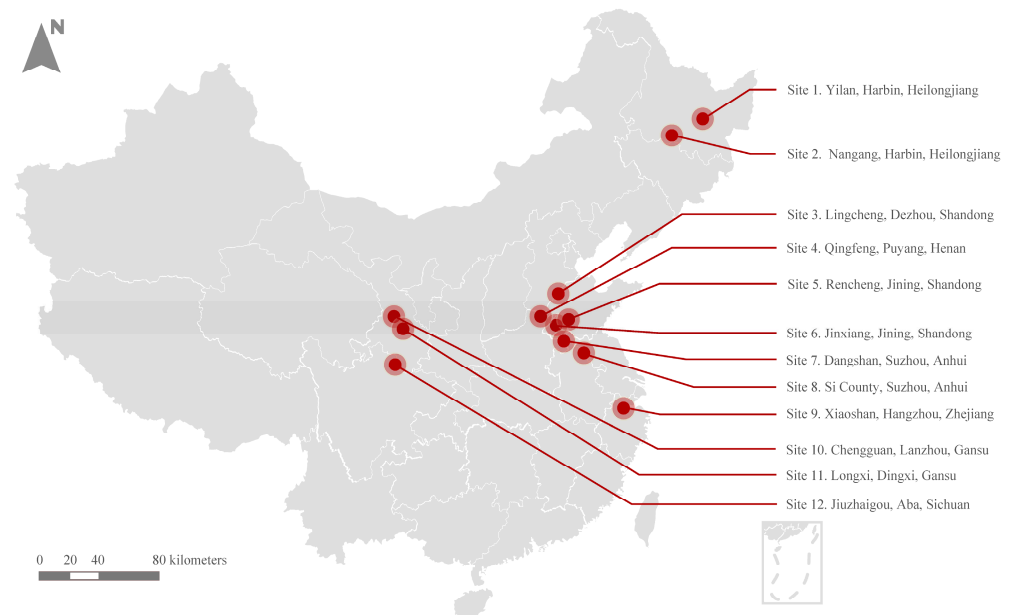

**Figure S2.** Distribution of investigation sites.

**Table S1.** Questions and scoring of each dimension of health belief model.

| Dimension                               | Number | Question                                                                                                      | Score/Points                                                                                                               |
|-----------------------------------------|--------|---------------------------------------------------------------------------------------------------------------|----------------------------------------------------------------------------------------------------------------------------|
| A. HPV and HPV vaccine knowledge        | A1     | Most cervical cancer is caused by a human papillomavirus infection                                            | 1: "Yes"; 0: "No", "Not sure"                                                                                              |
|                                         | A2     | The population infected with human papillomavirus HPV is                                                      | 1: "Both male and female"; 0: "Male only", "Female only", "Not sure"                                                       |
|                                         | A3     | The main route of transmission of HPV is                                                                      | 1: "sexual transmission"; 0: "mother to child transmission", "Close contact transmission", "Indirect contact transmission" |
|                                         | A4     | The body can automatically clear the HPV after being infected                                                 | 1: "Yes"; 0: "No", "Not sure"                                                                                              |
|                                         | A5     | Is it certain to get sick after an HPV infection                                                              | 1: "No"; 0: "Yes", "Not sure"                                                                                              |
|                                         | A6     | How many doses of the 9-valent HPV vaccine need to be administered                                            | 1: "3 times"; 0: "1 time", "2 times", "4 times", "Not sure"                                                                |
|                                         | A7     | Who needs HPV vaccination                                                                                     | 1: "Both male and female"; 0: "Male only", "Female only", "Not required for either sex"                                    |
|                                         | A8     | The best time to get HPV vaccinated is                                                                        | 1: "Before the first sexual behavior"; 0: "After birth", "After the first sexual behavior", "Any time", "Not sure"         |
| B. Perception of behavioral benefit     | B1     | I think HPV vaccines are important for protecting myself from HPV infection and related diseases              | 4-0: "Strongly agree"–"Strongly disagree"                                                                                  |
|                                         | B2     | I think the safety of the HPV vaccine can be guaranteed                                                       | 4-0: "Strongly agree"–"Strongly disagree"                                                                                  |
|                                         | B3     | I think the HPV vaccine is effective                                                                          | 4-0: "Strongly agree"–"Strongly disagree"                                                                                  |
| C. Perception of barriers               | C1     | Compared with myself, I treat my daughter to take medicine or play HPV vaccine more cautiously                | 4-0: "Strongly agree"–"Strongly disagree"                                                                                  |
|                                         | C2     | The current domestic bivalent HPV vaccine price is about 300 CNY. Do you think the price is reasonable?       | 3: "Reasonable"; 2: "Acceptable"; 1: "A little expensive"; 0: "Very expensive"                                             |
| D. Perception of disease susceptibility | D1     | As long as I keep a normal lifestyle, I will not be infected by HPV                                           | 4: "No"; 0: "Yes", "Not sure"                                                                                              |
|                                         | D2     | I think infection by HPV is because of sexual arbitrariness                                                   | 4-0: "Strongly agree"–"Strongly disagree"                                                                                  |
|                                         | D3     | My daughter is in good health and not afraid of an HPV infection                                              | 4-0: "Strongly agree"–"Strongly disagree"                                                                                  |
| E. Perception of disease severity       | E1     | HPV infection has serious consequences                                                                        | 1: "Yes"; 0: "No", "Not sure"                                                                                              |
|                                         | E2     | HPV infection can bring serious harm to my daughter's health                                                  | 4-0: "Strongly agree"–"Strongly disagree"                                                                                  |
|                                         | E3     | I think cervical cancer is a serious disease                                                                  | 4-0: "Strongly agree"–"Strongly disagree"                                                                                  |
|                                         | E4     | I worry that HPV infection will affect the child's fertility                                                  | 4-0: "Strongly agree"–"Strongly disagree"                                                                                  |
| F. Trust in formal information          | F1     | I trust the HPV vaccine knowledge and services provided by vaccination clinic and doctor                      | 4-0: "Strongly agree"–"Strongly disagree"                                                                                  |
|                                         | F2     | I trust the HPV vaccine knowledge and services provided by CDC, hospitals and other professional institutions | 4-0: "Strongly agree"–"Strongly disagree"                                                                                  |
|                                         | F3     | I trust HPV vaccine manufacturers and companies                                                               | 4-0: "Strongly agree"–"Strongly disagree"                                                                                  |

**Table S2.** Classification of reasons for not getting the HPV vaccine.

| Category                            | Reasons for mothers                                                                                                                                                                                                                                                                              | Reasons for daughters                                                                                                                                                                                                                                                                                                                                                                                                                                                                                                   |
|-------------------------------------|--------------------------------------------------------------------------------------------------------------------------------------------------------------------------------------------------------------------------------------------------------------------------------------------------|-------------------------------------------------------------------------------------------------------------------------------------------------------------------------------------------------------------------------------------------------------------------------------------------------------------------------------------------------------------------------------------------------------------------------------------------------------------------------------------------------------------------------|
| Non-vaccine hesitancy               | (1) Older ages<br>(2) Illness or medical reasons<br>(3) HPV vaccines shortage                                                                                                                                                                                                                    | (1) Daughter's illness or medical reasons<br>(2) HPV vaccines shortage                                                                                                                                                                                                                                                                                                                                                                                                                                                  |
| Vaccine/vaccination-specific issues | (1) Doubts about the vaccine efficacy<br>(2) Doubts about the vaccine safety<br>(3) Expensiveness<br>(4) Troublesome vaccination procedure                                                                                                                                                       | (1) Doubts about the vaccine efficacy.<br>(2) Doubts about the vaccine safety<br>(3) Expensiveness<br>(4) Troublesome vaccination procedure<br>(1) Don't know if my daughter can be vaccinated<br>(2) Wait for my daughter growing up and make the decision herself.<br>(3) My daughter has not started sexual behavior                                                                                                                                                                                                 |
| Individual and group influences     | (1) Don't know where to get vaccinated<br>(2) Infection with HPV usually has no serious consequences<br>(3) Never heard of the HPV vaccine<br>(4) No time to vaccinate<br>(5) My risk of HPV infection is low<br>(6) Be afraid of pain<br>(7) Poor service and attitude at the vaccination sites | (4) Wait for my daughter being old enough to receive the 9-valent vaccine<br>(5) Don't know where to get vaccinated<br>(6) Worry my daughter will have high-risk sexual behavior after vaccination<br>(7) Never heard of the HPV vaccine<br>(8) Infection with HPV usually has no serious consequences<br>(9) No time to vaccinate<br>(10) My daughter's risk of HPV infection is low<br>(11) My daughter is afraid of pain<br>(12) Poor service and attitude at the vaccination sites<br>(13) My daughter is too young |
| Contextual influences               | (1) Less people around me were vaccinated or they do not recommend this vaccine<br>(2) The HPV vaccine is not yet widely available<br>(3) Not convenient to reach the vaccination site                                                                                                           | (1) Less people around me were vaccinated or they do not recommend this vaccine<br>(2) The HPV vaccine is not yet widely available<br>(3) Not convenient to reach the vaccination site                                                                                                                                                                                                                                                                                                                                  |
